# Supplementary material for: Design of a light-sensitive tubular MoS2/C composite as the cathode for photo-enhanced rechargeable zinc-ion batteries
Source: Royal Society of Chemistry journal article supplement (doi:10.1039/d3ta07464a), 2024-01-01
Supplement: d3ta07464a1.pdf [file d3ta07464a1.pdf]

## Supporting Information

### Design of light-sensitive tubular MoS<sub>2</sub>/C composite as the cathode for photo-enhanced rechargeable zinc-ion battery

*Mengjue Cao, Duoyin Wang, Yi Feng, Xiaoli Gu and Jianfeng Yao\**

Jiangsu Co-Innovation Center of Efficient Processing and Utilization of Forest Resources, College of Chemical Engineering, Nanjing Forestry University, Nanjing 210037, China

\*Corresponding author. Email: [jfyao@njfu.edu.cn](mailto:jfyao@njfu.edu.cn)

#### 1. Supplemental Experimental Procedures

##### 1.1 Photo-responsive solid-state zinc-ion device

In this device, the gel electrolyte was prepared by dissolving 1.0 g polyvinyl alcohol (PVA, Mw: ~89000-98000) in 20 mL ZnSO<sub>4</sub> aqueous solution (2 M) under vigorous stirring at 90 °C for 2 h. The cathode was fabricated by coating MoS<sub>2</sub>/C-NT slurry on the PET/ITO substrate and Zn foil act as anodes (mass loading: 2 mg cm<sup>-2</sup>). The photo-responsive solid-state zinc-ion battery (PRZB) was assembled by sandwiching a gel electrolyte film of ZnSO<sub>4</sub>- (PVA) between metal Zn and MoS<sub>2</sub>/C-NT electrodes. The device was further sealed with 3M tape to prevent any gel electrolyte leakage. Cu conductive adhesive tape was tightly pasted to the margins of these electrodes.

##### 1.2 Calculation of capacitive contribution in total capacitance

The contribution of the capacitive-controlled reaction can be estimated according to the following equations proposed by Dunn.

$$i(v) = k_1v + k_2v^{1/2} \quad (1)$$

where  $i$  is the current ( $A\ g^{-1}$ ),  $v$  is the scan rate ( $mV\ s^{-1}$ ), and  $k_1v$  and  $k_2v^{1/2}$  correspond to the capacitive and diffusion contributions, respectively. The surface-controlled capacitance also reflects the rate performance of the electrode materials as well as the surface charge storage capability.

### 1.3 Calculation of conduction band

Generally, the hydrogen reduction potential is at 4.5 eV below the vacuum level. Therefore, the  $MoS_2$  edge positions related to the vacuum level can be expressed empirically by the following equation:<sup>1</sup>

$$E_{CB} = E_{VB} + E_g \quad (2)$$

The calculated edge positions of  $VB_{MoS_2}$  and  $CB_{MoS_2}$  were -3.59 eV (vs. vacuum) and -1.69 eV (vs. vacuum), respectively.

### 1.4 Calculation of photo-conversion efficiency

To demonstrate the contribution of photo-regulation in the photo-electrochemical coupling process, photo-conversion efficiency has been calculated by the following equation:<sup>2</sup>

$$\eta = \frac{E_S S_1}{P_{in} t S_2} \times 100\% \quad (3)$$

where  $\eta$  represents the photo-conversion efficiency,  $E_S$  is the areal energy density at a specific current of  $0.1\ mA\ cm^{-2}$ ,  $S_1$  is the photo positive electrode area,  $P_{in}$  is the photo-power density,  $t$  is the charging time under illuminated condition, and  $S_2$  is the illuminated surface area. As a result, the photo-conversion efficiency was calculated to be 0.98 % according to the experimental parameters.

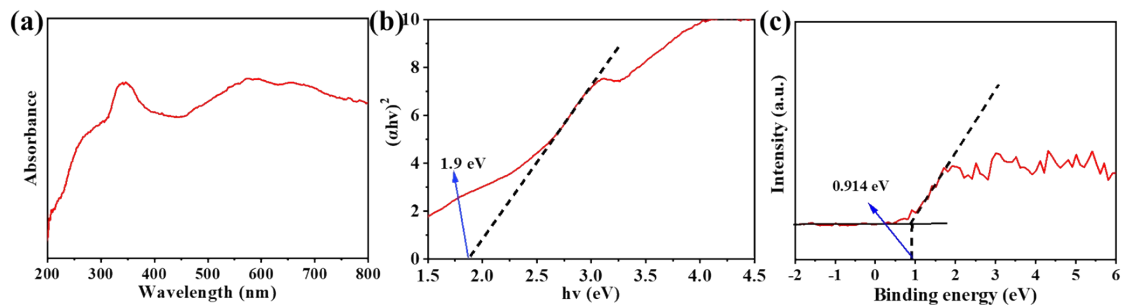

**Fig. S1** UV-vis absorption spectrum (a) and Tauc plot of MoS<sub>2</sub> (b) and valence band XPS spectra (c).

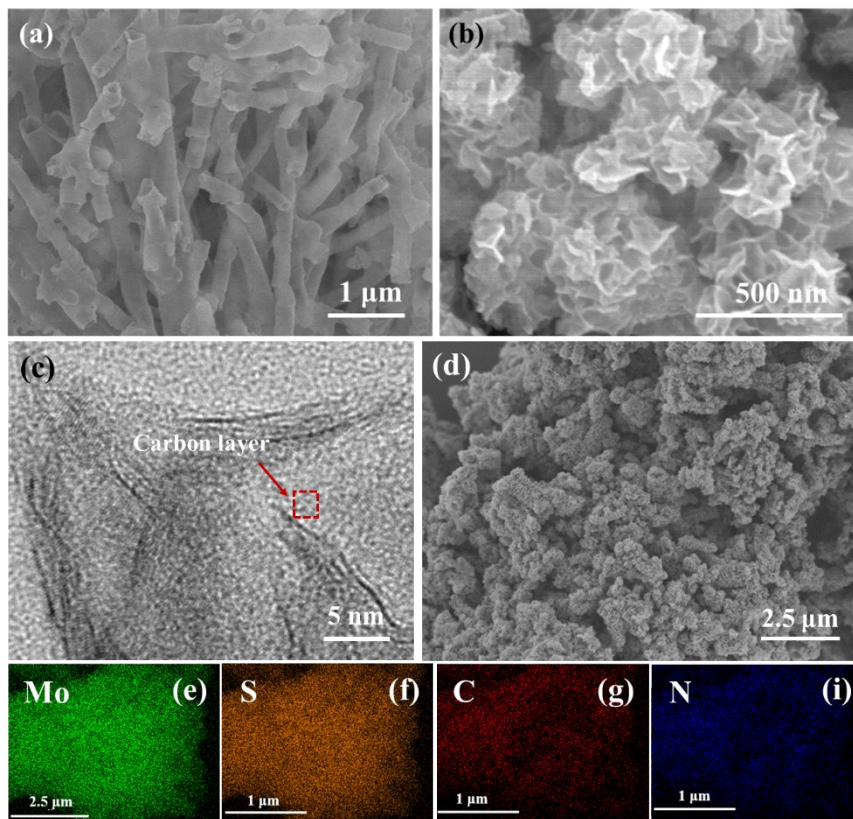

**Fig. S2** SEM images of g-C<sub>3</sub>N<sub>4</sub>-NT (a) and MoS<sub>2</sub> (b), HRTEM image of MoS<sub>2</sub>/C-NT (c), and SEM element mapping (d-i).

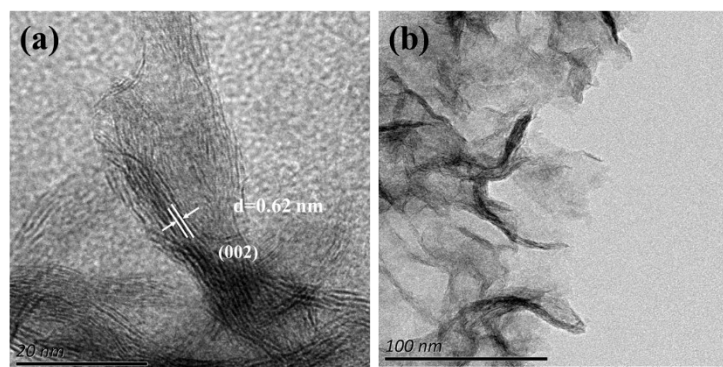

**Fig. S3** HRTEM image of MoS<sub>2</sub>/C-NT (a) and TEM image of MoS<sub>2</sub>(b).

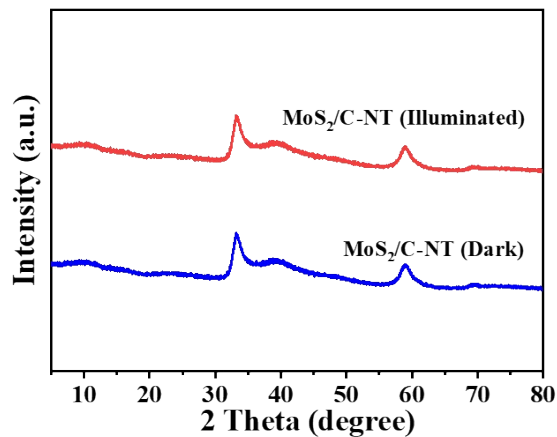

**Fig. S4** XRD patterns of MoS<sub>2</sub>/C-NT after light illumination.

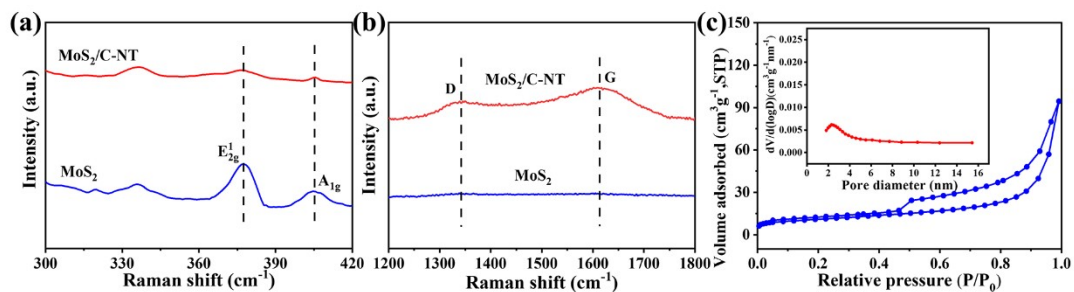

**Fig. S5** Raman spectra of MoS<sub>2</sub> and MoS<sub>2</sub>/C-NT with different range of Raman shift (300-420cm<sup>-1</sup>) (a) and (1200-1800cm<sup>-1</sup>) (b) and N<sub>2</sub> adsorption-desorption isotherm (inset: pore size distribution) (c).

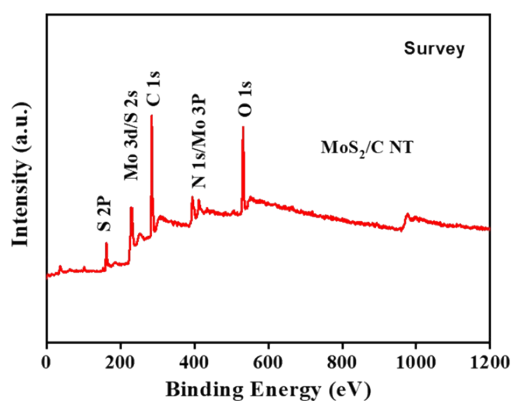

**Fig. S6** XPS survey spectrum of MoS<sub>2</sub>/C-NT.

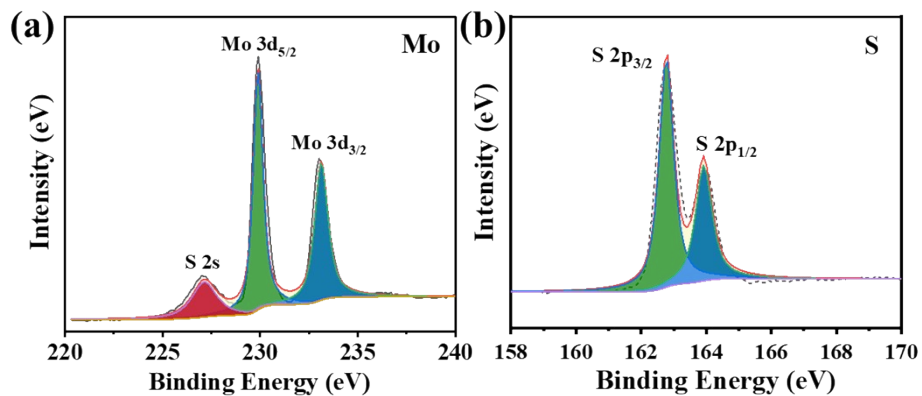

**Fig. S7** High resolution XPS spectra of (a) Mo 3d and (b) S 2p of the MoS<sub>2</sub>.

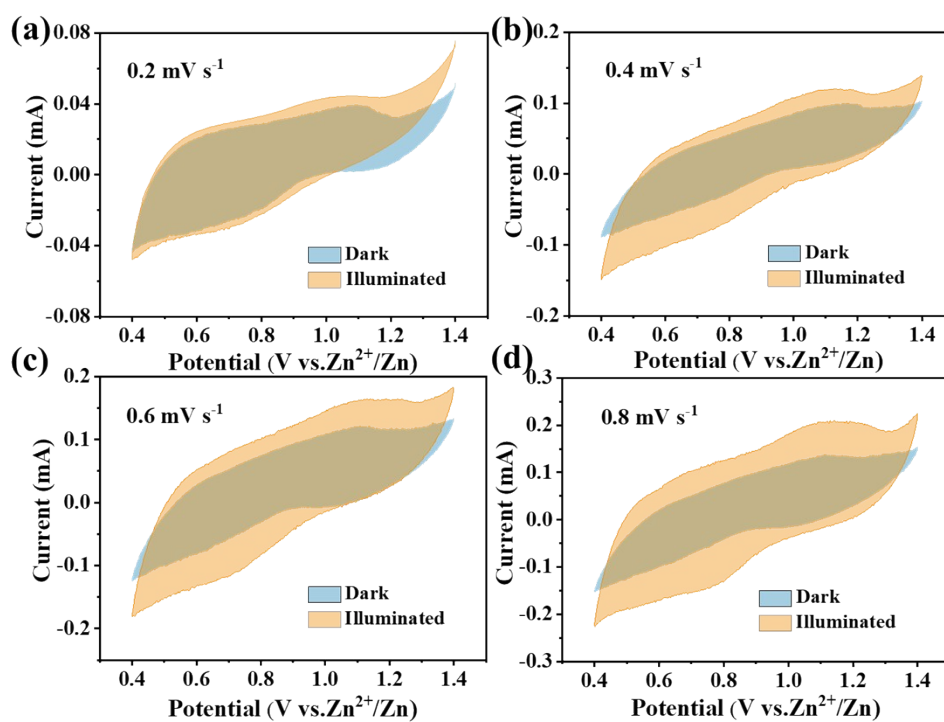

**Fig. S8** CV curves of the photo-ZIBs at scan rates of 0.2 mV s<sup>-1</sup> (a), 0.4 mV s<sup>-1</sup> (b), 0.6 mV s<sup>-1</sup> (c) and 0.8 mV s<sup>-1</sup> (d) in dark and illuminated states.

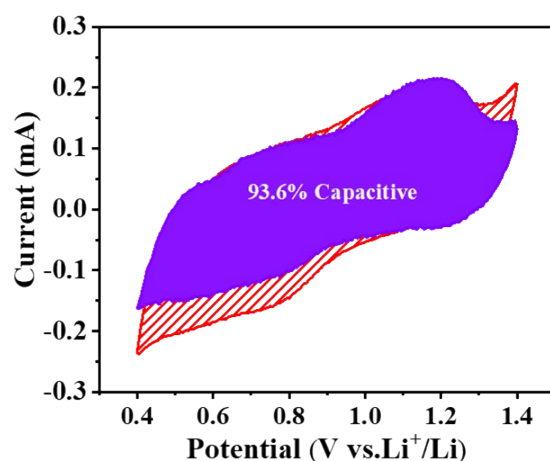

**Fig. S9** Capacitive contribution determinations to charge storage at  $0.8 \text{ mV s}^{-1}$  under illuminated conditions.

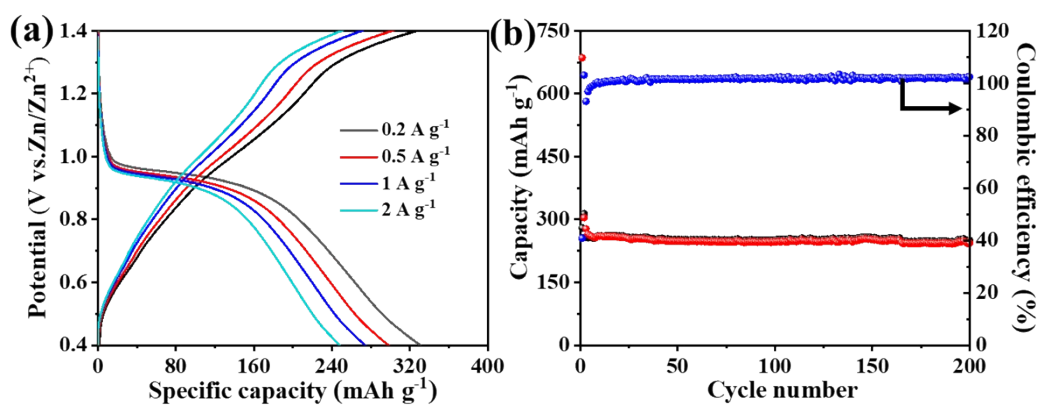

**Fig. S10** Galvanostatic charge–discharge curves of  $\text{MoS}_2/\text{C-NT}$  at current densities of  $0.2\text{--}2 \text{ A g}^{-1}$  (a) and cycling performance of  $\text{MoS}_2/\text{C-NT}$  at  $1 \text{ A g}^{-1}$  (b) under light condition.

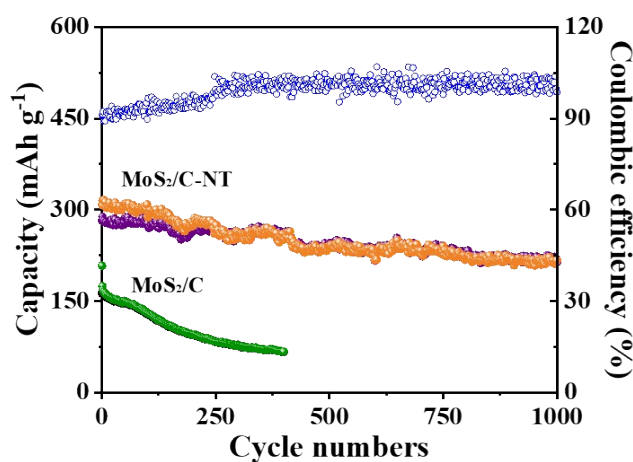

**Fig. S11** Long-term cycling test of the  $\text{MoS}_2/\text{C-NT}$  and  $\text{MoS}_2/\text{C}$  at a specific current of  $500 \text{ mA g}^{-1}$  in dark.

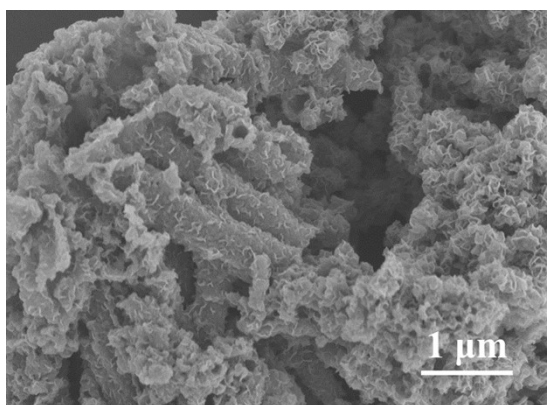

**Fig. S12** SEM images of the cycled photocathode for 200 cycles under light condition.

### GITT measurements:

During GITT test, the cell was discharged and charged at  $0.1 \text{ A g}^{-1}$  for 15min, and then relaxed for 30 min to allow the voltage to reach equilibrium. The  $\text{Zn}^{2+}$  diffusion coefficient ( $D_{\text{Zn}^{2+}}$ ) can be calculated by the following equation:<sup>3</sup>

$$D = \frac{4}{\pi t} \left( \frac{m_B V_M}{M_B S} \right)^2 \left( \frac{\Delta E_s}{\Delta E_\tau} \right)^2$$

Where  $V_M$ ,  $M_B$ ,  $m_B$  and  $S$  represent the molar volume of the active material, molar mass of the active material, mass of the active material and contact surface area of the anode, respectively;  $\tau$  represents the relaxation time, and  $\Delta E_s$  and  $\Delta E_\tau$  are the voltage difference during the pulse time and constant current charge/discharge process.

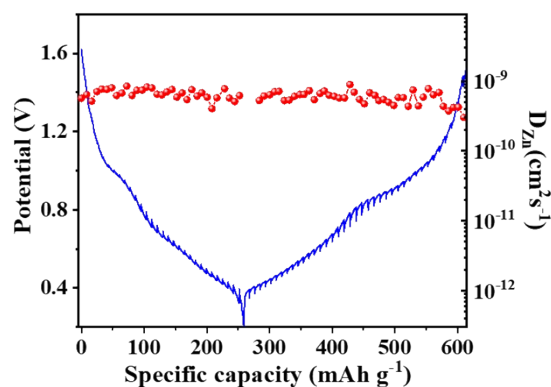

**Fig. S13** Discharge/charge GITT profiles at  $0.1 \text{ A g}^{-1}$  and the corresponding  $\text{Zn}^{2+}$  diffusion coefficients of  $\text{MoS}_2/\text{C-NT}$ .

**Table S1.** A summary of the important parameters and performance of the recently

| Positive electrode                                                                                                        | Battery System | Current density (mA g <sup>-1</sup> ) | Discharge capacity (mA h g <sup>-1</sup> ) | Photo power density (Mw cm <sup>-2</sup> ) | Cycling stability | Conversion efficiency (%) | Battery Type |
|---------------------------------------------------------------------------------------------------------------------------|----------------|---------------------------------------|--------------------------------------------|--------------------------------------------|-------------------|---------------------------|--------------|
| N719 dye/LiFePO <sub>4</sub> <sup>4</sup>                                                                                 | Li             | C/24                                  |                                            | 100                                        | 15                | 0.06-0.08                 | Coin cell    |
| (C <sub>6</sub> H <sub>9</sub> C <sub>2</sub> H <sub>4</sub> NH <sub>3</sub> ) <sub>2</sub> PbI <sub>4</sub> <sup>5</sup> | Li             | 40                                    | ~90-100                                    | 100                                        | 10                | 0.034                     | pouch cell   |
| TiO <sub>2</sub> /dye/Cu <sub>2</sub> S <sup>6</sup>                                                                      | Li             |                                       | 150                                        | 100                                        | 10                | ~ 0.1                     | Coin cell    |
| V <sub>2</sub> O <sub>5</sub> <sup>7</sup>                                                                                | Li             | 500                                   | 127                                        | 100                                        |                   | 0.22                      | Coin cell    |
| V <sub>2</sub> O <sub>5</sub> <sup>2</sup>                                                                                | Zn             | 50                                    | 370                                        | 12                                         |                   | 1.2                       | Coin cell    |
| VO <sub>2</sub> <sup>8</sup>                                                                                              | Zn             | 5000                                  | 190                                        | 12                                         | 250               | 0.18                      | Coin cell    |
| NT-COF <sup>9</sup>                                                                                                       | Li             |                                       | 100                                        | 100                                        | 100               |                           | Coin cell    |
| Li <sub>x</sub> TiO <sub>2</sub> nanoparticle <sup>10</sup>                                                               | Li             | 47                                    | 240                                        |                                            |                   |                           | Coin cell    |
| C60@POC <sup>11</sup>                                                                                                     | Li             |                                       | 184                                        | 200                                        | 100               | ~1.0                      | Coin cell    |
| MnO <sub>2</sub> <sup>12</sup>                                                                                            | Al             | 100                                   | 531                                        | 100                                        | 10                | 1.2                       | Coin cell    |
| <b>This work</b>                                                                                                          | Zn             | 500                                   | 216                                        | 100                                        | 200               | 0.98                      | Coin cell    |

reported photo-actuated batteries.

## References

1. R. Z. Yaqin Wang, Jianbao Li, Liangliang Li, Shiwei Lin *Nanoscale Research Letters* volume, 2014, **9**, 1-8.
2. B. D. Boruah, A. Mathieson, B. Wen, S. Feldmann, W. M. Dose and M. De Volder, *Energy Environ. Sci.*, 2020, **13**, 2414-2421.
3. F. Li, H. Ma, H. Sheng, Z. Wang, Y. Qi, D. Wan, M. Shao, J. Yuan, W. Li, K. Wang, E. Xie and W. Lan, *Small*, 2023, 202306276.
4. A. Paolella, C. Faure, G. Bertoni, S. Marras, A. Guerfi, A. Darwiche, P. Hovington, B. Commarieu, Z. Wang, M. Prato, M. Colombo, S. Monaco, W. Zhu, Z. Feng, A. Vijn, C. George, G. P. Demopoulos, M. Armand and K. Zaghbi, *Nat. Commun.*, 2017, **8**, 14643.
5. S. Ahmad, C. George, D. J. Beesley, J. J. Baumberg and M. De Volder, *Nano Lett.*, 2018, **18**, 1856-1862.
6. C. Xu, X. Zhang, L. Duan, X. Zhang, X. Li and W. Lu, *Nanoscale*, 2020, **12**, 530-537.
7. B. D. Boruah, B. Wen and M. De Volder, *Nano Lett.*, 2021, **21**, 3527-3532.
8. B. Deka Boruah, A. Mathieson, S. K. Park, X. Zhang, B. Wen, L. Tan, A. Boies



- and M. De Volder, *Adv. Energy Mater.*, 2021, **11**,2100115.
9. J. Lv, Y. X. Tan, J. Xie, R. Yang, M. Yu, S. Sun, M. D. Li, D. Yuan and Y. Wang, *Angew. Chem. Int. Ed.*, 2018, **57**, 12716-12720.
10. C. Andriamiadamanana, I. Sagaidak, G. Bouteau, C. Davoisne, C. Laberty-Robert and F. Sauvage, *Advanced Sustainable Systems*, 2018, **2**, 1700166.
11. X. Zhang, K. Su, A. G. A. Mohamed, C. Liu, Q. Sun, D. Yuan, Y. Wang, W. Xue and Y. Wang, *Energ. Environ. Sci.*, 2022, **15**, 780-785.
12. X. Zhang, W.L. Song, M. Wang, J. Tu, H. Jiao and S. Jiao, *Energy Storage Mater.*, 2022, **45**, 586-594.
